# Supplementary material
Source: PubMed Central journal article supplement (PMC3858992)
Supplement: gf570de_10-1055-s-0032-1328075.pdf [file gf570de_10-1055-s-0032-1328075.pdf]

# Epidemiologie des Mammakarzinoms – aktuelle Zahlen und Trends

## Epidemiology of Breast Cancer – Current Figures and Trends

### Autoren

N. Eise mann<sup>1</sup>, A. Waldmann<sup>2</sup>, A. Katalinic<sup>1,2</sup>

### Institute

<sup>1</sup> Institut für Krebs epidemiologie e. V., Lübeck

<sup>2</sup> Institut für Klinische Epidemiologie, Lübeck

### Schlüsselwörter

- Brustkrebs
- Epidemiologie
- Prävalenz
- Inzidenz
- Prognose
- Mortalität

### Key words

- breast cancer
- epidemiology
- prevalence
- incidence
- prognosis
- mortality

### Zusammenfassung

Die Epidemiologie des Mammakarzinoms hat sich in den letzten Jahren deutlich verändert. Anhand aktueller Daten aus epidemiologischen Krebsregistern werden Kennzahlen zu Inzidenz, Prävalenz, Mortalität und Überleben nach Brustkrebs präsentiert. Die Anzahl an Neuerkrankungen ist auf rund 72 000 in 2009 gestiegen (+23% seit 2003). Es wird geschätzt, dass derzeit 250 000 Frauen mit einem prävalenten Brustkrebs (5-Jahres-Prävalenz) in Deutschland leben. Die häufigste Lokalisation ist der äußere obere Quadrant der Brust. Ein schlecht differenziertes oder undifferenziertes Tumorgewebe wird bei jeder 3. Patientin gefunden. Seit 2003 ist die altersstandardisierte Mortalität leicht gesunken (–9%), während sich das relative Überleben von 79 auf 86% verbessert hat. Veränderungen in der Epidemiologie des Mammakarzinoms dürften insbesondere auf Früherkennungsmaßnahmen wie die Einführung des Mammografie-Screenings, aber auch auf verbesserte Therapien zurückzuführen sein. Inwiefern das Mammografie-Screening zu einer weiteren Mortalitätsreduktion beitragen kann, bleibt abzuwarten.

### Abstract

The epidemiology of breast cancer has clearly changed in the past few years. On the basis of current data from population-based cancer registries characteristic numbers for incidence, prevalence, mortality and survival after breast cancer are presented. The number of incident cases has increased to around 72 000 in 2009 (+23% since 2003). It is estimated that at present 250 000 women with a prevalent breast cancer (5-year prevalence) are living in Germany. The most frequent localisation is the outer upper quadrant of the breast. Poorly differentiated or undifferentiated tumour tissue is found in every third patient. Since 2003 the age-standardised mortality has declined slightly (–9%) whereas the relative survival has improved from 79 to 86%. Changes in the epidemiology of breast cancer can most probably be attributed to the introduction of early detection programmes such as mammography screening as well as to improved treatment options. To what extent mammography screening will lead to a further reduction of mortality remains to be seen.

**eingereicht** 19.10.2012

**revidiert** 14.11.2012

**akzeptiert** 22.11.2012

### Bibliografie

**DOI** <http://dx.doi.org/10.1055/s-0032-1328075>  
Geburtsh Frauenheilk 2013; 73:  
1–6 © Georg Thieme Verlag KG  
Stuttgart · New York ·  
ISSN 0016-5751

### Korrespondenzadresse

**Nora Eise mann**  
Institut für Krebs epidemiologie  
Ratzeburger Allee 160 (Haus 50)  
23538 Lübeck  
[nora.eise mann@uksh.de](mailto:nora.eise mann@uksh.de)

### Einleitung

Dem Brustkrebs kommt als häufigster Tumorerkrankung der Frau eine besondere Bedeutung zu. Aktuell gilt, dass 1 von 8 Frauen in ihrem Leben von der Diagnose Mammakarzinom betroffen ist. Während diese Diagnose vor wenigen Jahrzehnten noch meist mit einer fatalen Prognose einherging, kann heute die Mehrheit der Patientinnen mit einer normalen Lebensdauer rechnen. Dies ist überwiegend auf Fortschritte in der Therapie, aber auch auf eine verbesserte Früherkennung zurückzuführen [1].

Die Veränderungen im Sektor der Brustkrebsfrüherkennung und -therapie hatten und haben einen entscheidenden Einfluss auf die Epidemiologie des Brustkrebses [1,2]. Seit 2005 wurde begonnen Frauen zwischen 50 und 69 Jahren alle 2 Jahre zur Teilnahme am Brustkrebs-Screening einzuladen, wodurch vermehrt asymptomatische Tumoren in einem früheren Stadium entdeckt und behandelt werden können [3]. Im Bereich der Bildgebung wurden Verbesserungen erzielt, die eine korrekte und frühzeitige Diagnose erleichtern. Technische Innovationen wie die digitale Tomosynthese, bei der durch eine 3-dimensionale Darstellung Tumoren differenzierter dargestellt

werden können, reduzieren falsch positive und falsch negative Befunde [4–7]. Die Erfahrungen und Erkenntnisse der letzten Jahrzehnte wurden in einer S3-Leitlinie gebündelt und stehen den behandelnden Ärzten als Leitlinien zu einer evidenzbasierten Behandlung zu Verfügung [8, 17]. Außerdem findet die Versorgung der Patientinnen zunehmend in zertifizierten Brustzentren statt [19, 20]. Durch die Konzentrierung der Versorgung lässt sich eine stärker spezialisierte Versorgung anbieten. All dies schlägt sich in zeitlichen Trends und veränderten aktuellen epidemiologischen Kennzahlen nieder, die im Folgenden berichtet werden.

## Inzidenz und Mortalität in Deutschland

In Deutschland erkrankten 2008 fast 72 000 Frauen an einem invasiven Brustkrebs (● **Tab. 1**), dies entspricht einer rohen Neuerkrankungsrate von circa 171,1 pro 100 000 Frauen. Hinzu kamen 6500 Frauen mit In-situ-Tumoren der Brust (rohe Rate 15,5/100 000 Frauen). Altersstandardisiert waren 123,8 von 100 000 Frauen von einer invasiven und 11,1 von 100 000 Frauen von einer In-situ-Brustkrebsdiagnose betroffen (Europäische Standardbevölkerung) [2]. Die Patientinnen waren zum Zeitpunkt der Diagnose durchschnittlich 65 Jahre alt, wobei Patientinnen mit einer In-situ-Diagnose im Mittel 6 Jahre jünger waren (● **Tab. 1**). Im selben Jahr starben 17 000 Patientinnen am Mammakarzinom (rohe Rate 41,1/100 000 Frauen). Die altersstandardisierte Mortalitätsrate beträgt 24,0 pro 100 000 (Europäische Standardbevölkerung) [2, 9].

Innerhalb Deutschlands bestehen regionale Unterschiede in der Brustkrebsinzidenz und -mortalität. In den östlichen Bundesländern ist die Inzidenzrate am geringsten, während im Norden (Schleswig-Holstein) die höchsten Raten auftreten. Auch die Mortalität ist in den östlichen Bundesländern am niedrigsten, gefolgt von etwas höheren Raten in den südlichen Bundesländern (Bayern, Baden-Württemberg, Hessen) und den höchsten Sterberaten in den nordwestlichen Ländern [10].

● **Abb. 1** zeigt den zeitlichen Verlauf der Inzidenz und Mortalität in Deutschland. Die Inzidenz ist bis 2006 relativ konstant, steigt dann aber deutlich an. Im Jahr 2009 liegt sie 18% über dem Wert aus dem Jahr 2003, dies entspricht einer Zunahme von 18,7 Fällen pro 100 000 Frauen. Die wichtigste Ursache für den Inzidenzanstieg ist die Einführung des Mammografie-Screenings. 2005 startete in den ersten Screening-Einheiten das Einladungswesen zum Brustkrebs-Screening. In den folgenden Jahren wurden nach und nach weitere Screening-Einheiten gegründet und die Flächendeckung der bestehenden Einheiten verbessert. In 2007 waren 50% der Regionen, seit 2008 sind nahezu alle Regionen in Deutschland mit Screening-Einheiten mit einer Flächendeckung von 75–100% versorgt [3]. Insofern dürfte insbesondere der große Inzidenzsprung von 114 pro 100 000 im Jahr 2007 auf 124 pro 100 000 im Jahr 2008 auf die Erreichung der Flächendeckung sowie damit verbunden die erhöhte Teilnahme am Mammografie-Screening und die Entdeckung prävalenter Tumoren zurückzuführen sein. Die Brustkrebsmortalität geht im dargestellten Zeitraum von 1998 an kontinuierlich zurück; und zwar mit einer jährlichen Mortalitätsreduktion um durchschnittlich 1–2%. Verglichen mit 1998, als die altersstandardisierte Rate noch 28,8 Sterbefälle pro 100 000 Frauen betrug, liegt die Mortalität im Jahr 2008 um 14,6% niedriger, d. h. es starben 4,2 von 100 000 Frauen weniger an Brustkrebs. Dieser Umstand ist bemerkenswert. Zum einen spricht dies für eine deutlich verbesserte Therapie. Zum

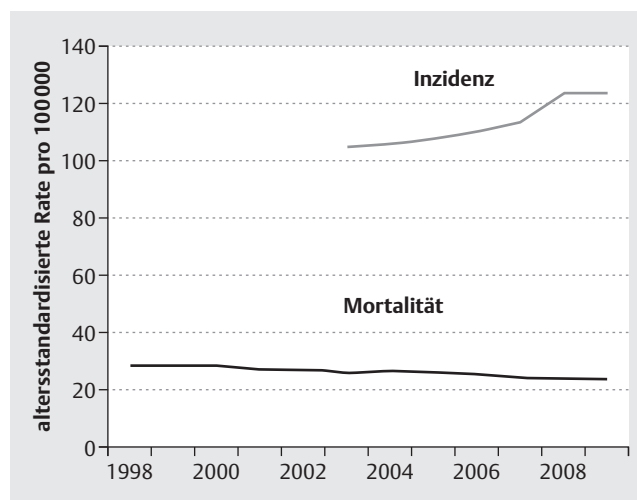

**Abb. 1** Altersstandardisierte Inzidenz- und Mortalitätsraten in Deutschland über die Zeit (Europastandard; Datenquellen: Gesellschaft der epidemiologischen Krebsregister in Deutschland und Statistisches Bundesamt [2, 9]).

**Tab. 1** Übersicht über die wichtigsten epidemiologischen Maßzahlen für Deutschland 2008/2009 (Datenquellen: Zentrum für Krebsregisterdaten [ZFKD], Gesellschaft der epidemiologischen Krebsregister in Deutschland e. V. [GEKID] und Statistisches Bundesamt).

| Inzidenz                            | ZFKD 2008 | GEKID 2009 |
|-------------------------------------|-----------|------------|
| mittleres Erkrankungsalter          |           |            |
| ▶ invasiv                           | 65        |            |
| ▶ in situ                           |           | 59*        |
| Inzidenz                            |           |            |
| ▶ invasiv                           |           |            |
| ▶ Fallzahl                          | 71 660    | 71 874     |
| ▶ rohe Rate, pro 100 000            | 171,1     | 171,6      |
| ▶ ASR [E], pro 100 000              | 123,1     | 123,8      |
| ▶ in situ                           |           |            |
| ▶ Fallzahl                          | 6 500     |            |
| ▶ rohe Rate, pro 100 000            | 15,5      |            |
| ▶ ASR [E], pro 100 000              |           | 13,3**     |
| ▶ 5-Jahres-Überleben                |           |            |
| ▶ absolut                           | 78%       |            |
| ▶ relativ                           | 86%       |            |
| ▶ 5-Jahres-Prävalenz                |           |            |
| ▶ Fallzahl                          | 273 000   |            |
| ▶ rohe Rate, pro 100 000            | 685,3     |            |
| <b>Mortalität</b>                   |           |            |
| <b>Statistisches Bundesamt 2009</b> |           |            |
| mittleres Sterbealter               |           |            |
| 71,2                                |           |            |
| Mortalität                          |           |            |
| ▶ Fallzahl                          | 17 066    |            |
| ▶ rohe Rate, pro 100 000            | 40,9      |            |
| ▶ ASR [E], pro 100 000              | 23,4      |            |

ASR [E] = altersstandardisierte Rate nach Europastandard  
 Datenquellen: wenn nicht anders angegeben, ZFKD [1], GEKID [2],  
 Statistisches Bundesamt [9]

\* Datenquelle: Datensatz des Epidemiologischen Krebsregisters Schleswig-Holstein,  
 Datenstand Oktober 2012

\*\* Datenquelle: Katalinic et al. [14]

anderen könnte dies auch auf verstärkte Anstrengungen in der Brustkrebsdiagnostik und -früherkennung zurückzuführen sein. Leider gibt es für eine eindeutige Trennung bzw. Attribuierung

von Effekten der Therapie und der Früherkennung kaum belastbare Daten.

## Tumorstadien

Die Mehrheit der Brustkrebstumoren wird inzwischen in einem frühen Stadium diagnostiziert. Von allen neu erkrankten Patientinnen (exklusive Patientinnen, die nur durch Todesscheinmeldungen bekannt sind) befanden sich 2007/2008 laut Daten der epidemiologischen Krebsregister rund 40% im Stadium T1. Bei ihnen war der entdeckte Tumor maximal 2 cm groß. Circa 30% der Patientinnen hatten einen Tumor, der größer als 2 cm, aber maximal 5 cm groß war (Stadium T2). Im Stadium T3 und T4 wurden jeweils 4 bzw. 5% der Neuerkrankten diagnostiziert. Bei circa 13% war das Stadium unbekannt [1]. In 9% der Fälle wird Brustkrebs bereits in seiner Frühform, als Carcinoma in situ, entdeckt. Auf einen In-situ-Tumor kommen damit ungefähr 11 invasive Tumoren.

Bereits vor der Einführung des Mammografie-Screenings lag in der Altersgruppe der screeningberechtigten Frauen im Vergleich zur allgemeinen weiblichen Bevölkerung eine etwas günstigere Stadienverteilung vor (T1-Anteil 46 vs. 40%). Da die relative Verteilung der Tumorstadien zur Beurteilung eines Screenings wenig aussagekräftig ist (eine absolute Zunahme von günstigen Stadien bewirkt einen scheinbaren prozentualen Rückgang ungünstiger Stadien), wird im Folgenden die Veränderung der absoluten Erkrankungszahlen nach Tumorstadium betrachtet [11]. Zwischen 2002 und 2007 nahm die absolute Anzahl an Brustkrebsdiagnosen in der Altersgruppe der screeningberechtigten Frauen deutlich zu (ohne Todesscheinmeldungen und inklusive In-situ-Fällen; insgesamt um 15%): für In-situ-Tumoren um +94%, für T1-Tumoren um +18%, für T2-Tumoren um +11%, für T3-Tumoren um +14% sowie für Tumoren mit unbekanntem Stadium um +24% zu, während für T4-Tumoren ein Rückgang um -10% zu beobachten war [3].

Aufgrund möglicher Verzerrungen sollte eine Interpretation dieser Daten vorsichtig geschehen. Das graue Screening dürfte bereits vor Einführung des Mammografie-Screenings die Brustkrebsepidemiologie und damit auch die Tumorstadienverteilung deutlich beeinflusst haben, wodurch der Effekt eines Mammografie-Screenings weniger deutlich ausfallen könnte. Weiter ist zu bedenken, dass die vorliegenden Daten noch nicht bundesweit vorliegen (Baden-Württemberg und Hessen fehlen noch) und bei den bestehenden Registern durchaus noch Unterschiede in der Datenqualität vorliegen. Dennoch umfassen die Daten bereits 79,6% der screeningberechtigten Frauen. Trotz dieser Unsicherheiten kann die berichtete Abnahme der absoluten Anzahl an Brustkrebserkrankungen im prognostisch ungünstigen T4-Stadium, welches für den überwiegenden Anteil der Todesfälle verantwortlich ist, als ein Hinweis auf eine mögliche künftige Mortalitätsreduktion gedeutet werden. Neben dem angestrebten Effekt des Mammografie-Screenings, der Abnahme an brustkrebsbedingten Todesfällen, sind auch Hinweise auf weniger wünschenswerte Effekte sichtbar; die starke Zunahme an prognostisch günstigen Tumoren (vor allem der hohe Anstieg der In-situ-Karzinome) könnte ein Hinweis auf Überdiagnosen und damit Übertherapie sein. Für die Situation in Deutschland kann eine mögliche Überdiagnostik durch das Mammografie-Screening derzeit noch nicht quantifiziert werden; ein aktueller Review geht basierend auf randomisierten kontrollierten Studien von 11 bzw. 19% Überdiagnosen aus [12].

## Überleben

Verglichen mit Krebs insgesamt, hat Brustkrebs heute (abhängig vom Stadium) eine gute Prognose. So überleben 78% der neu erkrankten Frauen die nächsten 5 Jahre [1]. Diese sogenannte absolute 5-Jahres-Überlebensrate berücksichtigt jedoch noch nicht, dass ein Teil der Brustkrebspatientinnen auch durch andere Todesursachen verstirbt. Das sogenannte relative 5-Jahres-Überleben, welches nur den Anteil an Todesfällen berücksichtigt, der zusätzlich zur normalen Sterblichkeit auftritt, ist bei Brustkrebspatientinnen deutlich höher als die absolute Sterblichkeit und beträgt 86%. Von 100 Frauen, die ohne ein Mammakarzinom 5 Jahre überlebt hätten, überleben diesen Zeitraum also 86 Frauen auch mit bzw. trotz ihrer Brustkrebserkrankung. In 2002/2003 lag das relative Überleben, allerdings nur auf Basis der Daten des Krebsregisters Saarland, noch bei 79% [13].

## Altersgruppen

Mit zunehmendem Alter steigt das Risiko, an Brustkrebs zu erkranken (Abb. 2). Bis zu einem Alter von 30 Jahren ist Brustkrebs eine seltene Erkrankung, während die höchsten Inzidenzraten im Jahre 2008 mit über 400 pro 100 000 in den Altersgruppen der 60- bis 64- und der 65- bis 69-Jährigen auftraten.

Abb. 3 stellt den zeitlichen Verlauf der Inzidenz für die Gruppe der screeningberechtigten Frauen im Alter von 50–69 Jahren sowie für die Gruppen der jüngeren und der älteren Frauen dar. Im Jahre 2003 waren 39 von 100 000 Frauen zwischen 30 und 39 Jahren und 135 von 100 000 Frauen zwischen 40 und 49 Jahren von einer Brustkrebsdiagnose betroffen. In beiden Gruppen stieg die Rate seit 2003 langsam an (+15 bzw. +7%). Vor Beginn der Screening-Aktivitäten wurde unter den 50- bis 69-Jährigen bei rund 275 von 100 000 Frauen ein Mammakarzinom entdeckt. In dieser nun Screening-berechtigten Gruppe ist im Gegensatz zu den jüngeren Frauen ein ausgeprägter Anstieg um ca. +27% zu beobachten. In der ältesten Altersgruppe lag die Inzidenz vor Beginn der Screening-Aktivitäten bei ungefähr 360 von 100 000 Frauen und sank ab dem Jahr 2006 auf circa 300 pro 100 000 Fälle.

Ebenfalls in Abb. 3 wird die Entwicklung der Mortalität für den Zeitraum 1998 bis 2009 in den 4 Altersgruppen präsentiert. In allen Gruppen ist ein Abwärtstrend zu beobachten, der durchschnittlich rund -2% pro Jahr beträgt. Auffällig ist der Rückgang der altersstandardisierten Mortalitätsrate um 7% in der Screening-berechtigten Altersgruppe in 2007, welcher einer Abnahme um 4,2 Sterbefällen pro 100 000 Frauen entspricht. Da Abweichungen von der durchschnittlichen Mortalitätsveränderung in dieser Größenordnung auch zufälliger Natur sein können, lässt sich nicht unmittelbar auf einen Zusammenhang zu positiven Effekten des Mammografie-Screenings schließen.

## Histologie, Lokalisation und Differenzierungsgrad

Bis auf wenige Ausnahmen handelt es sich bei Brustkrebstumoren um Adenokarzinome (98,8%). Die häufigste Lokalisation eines Mammakarzinoms ist der obere äußere Quadrant der betroffenen Brust. Bei jeder 3. Patientin (36,1%) wurde der Tumor an dieser Lokalisation gefunden (Datensatz des Epidemiologischen Krebsregisters Schleswig-Holstein, 2008; Stand der Datenbank: Oktober 2012). Daran angrenzend sind der obere innere

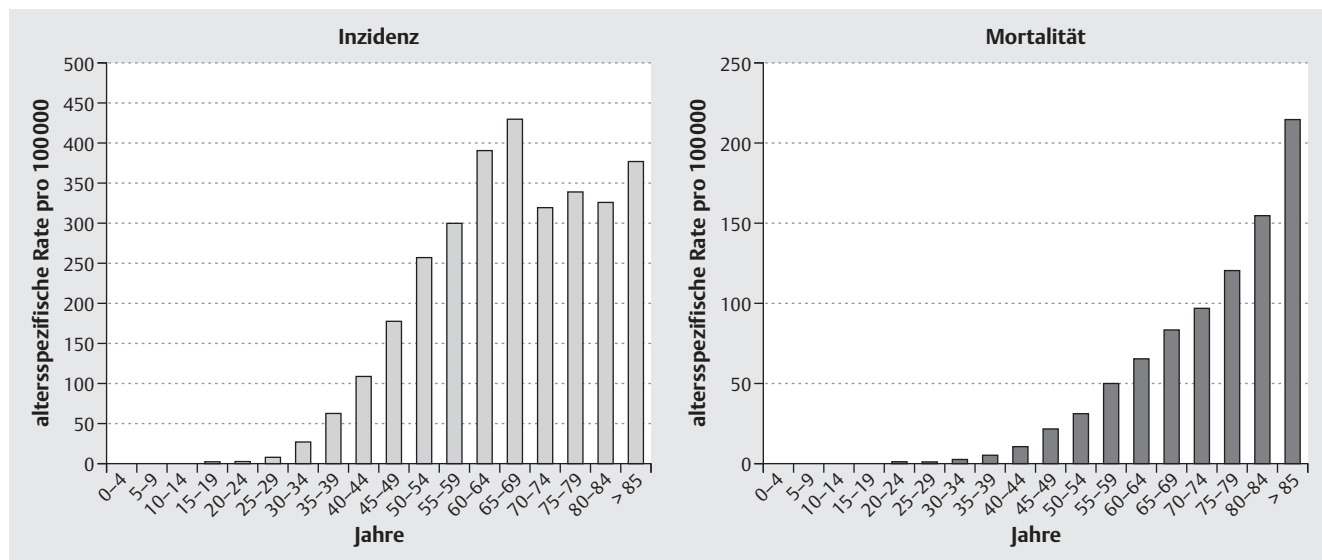

**Abb. 2** Altersspezifische Inzidenz und Mortalität pro 100 000 im Jahr 2008 (Datenquelle: Gesellschaft der epidemiologischen Krebsregister in Deutschland und Statistisches Bundesamt [2, 9]).

Quadrant und der untere äußere Quadrant die nächst häufigsten Tumorentstehungsorte (9,4 bzw. 5,8%). Bei einer von 19 Frauen (5,2%) befindet sich der Tumor im unteren inneren Quadranten oder nahezu ebenso häufig (4,5%) im zentralen Drüsenkörper. Die Mamille und der Recessus axillaris sind nur selten betroffen (0,7 bzw. 0,3%). Mehrere überlappende Teilbereiche werden bei jeder 9. Frau gefunden (11,4%).

Der Differenzierungsgrad des Tumorgewebes ist für die Prognose und Therapie bedeutsam. Ein gut differenziertes Gewebe ist mit einer besseren Prognose assoziiert als ein schlecht differenziertes Gewebe. Bei jeder 8. Patientin (12,5%), die 2008 in Schleswig-Holstein mit Brustkrebs diagnostiziert wurde, ergab die Biopsie ein gut differenziertes Gewebe. Bei über der Hälfte der Frauen war das Tumorgewebe mäßig differenziert (54,3%), und bei fast jeder 3. Patientin (30,0%) wurde ein schlecht differenziertes Ge-

webe gefunden. Undifferenziertes Gewebe wurde nur in Ausnahmefällen festgestellt (0,3%). Bei 2,9% der Patientinnen war der Differenzierungsgrad nicht bestimmbar oder unbekannt [16].

### Internationaler Vergleich

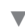

Die Anzahl der jährlichen Neuerkrankungen weltweit wird auf 1,38 Mio. geschätzt, davon entfallen 450 000 Fälle auf Europa [14]. Entwicklungsländer weisen deutlich geringere Inzidenzraten auf als Industrieländer (● **Abb. 4**). Die höchsten Raten finden sich mit 89,7 Neuerkrankungen pro 100 000 Einwohnerinnen in Westeuropa (Weltstandard), die niedrigsten Raten sind in Afrika mit rund 20 Fällen pro 100 000 Einwohnerinnen zu finden. Gleichwohl führt Brustkrebs in allen Ländern die Liste der häu-

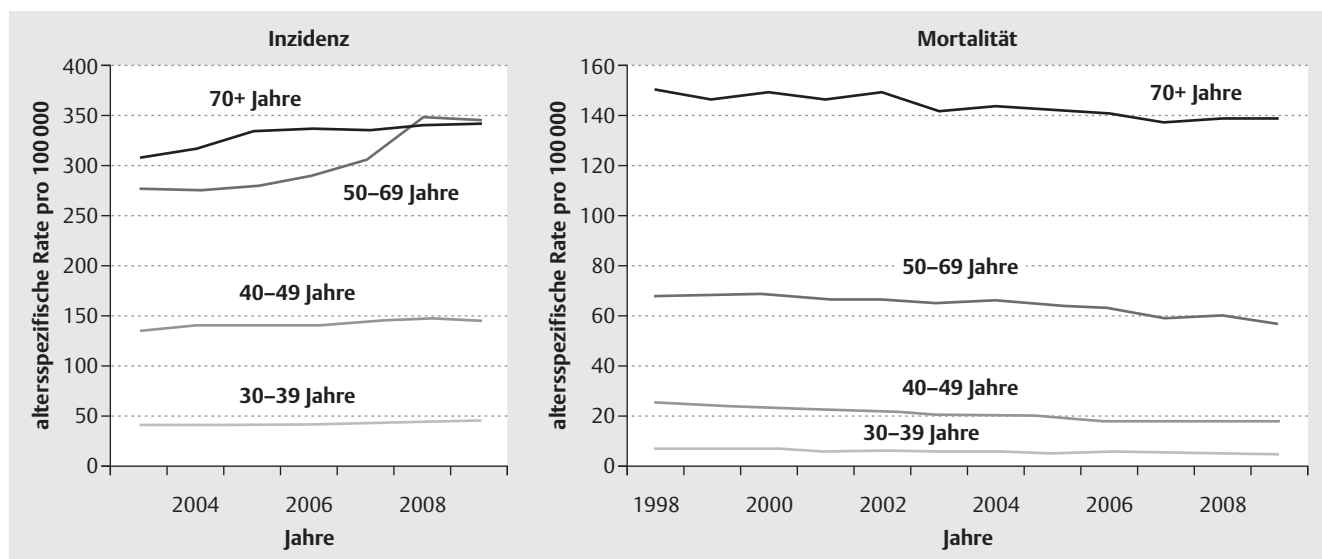

**Abb. 3** Rohe Inzidenz- und Mortalitätsraten in Deutschland nach Altersgruppen über die Zeit (Datenquelle: Gesellschaft der epidemiologischen Krebsregister in Deutschland und Statistisches Bundesamt [2, 9]).

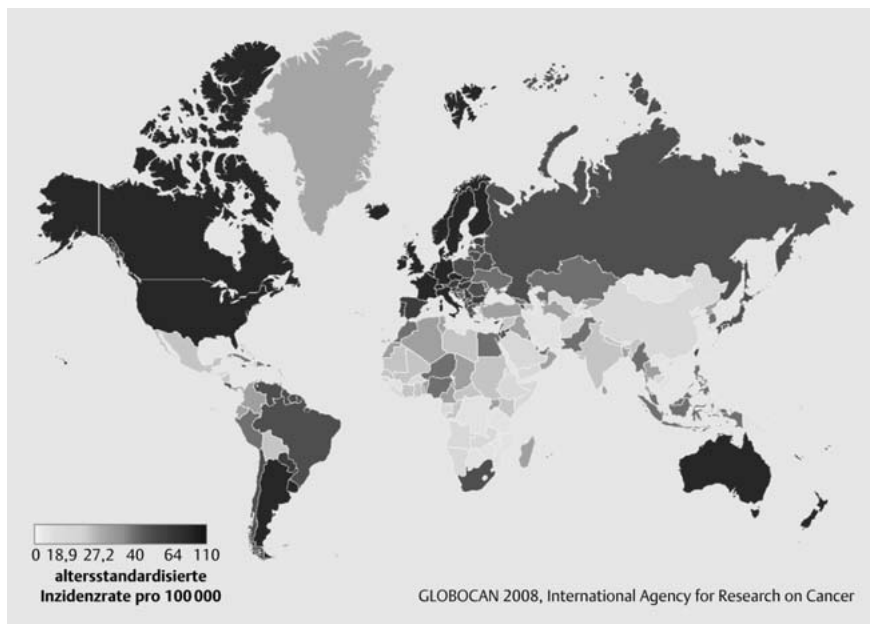

**Abb. 4** Altersstandardisierte Brustkrebsinzidenz weltweit (Datenquelle: Globocan [14]).

figsten Krebserkrankungen an. Die regionalen Unterschiede in der Brustkrebsmortalität fallen deutlich geringer aus (zwischen 6 und 19 Sterbefälle pro 100 000) als die Unterschiede in der Inzidenz, da Patientinnen auch in Ländern mit einer sehr hohen Inzidenz häufig eine sehr gute Prognose haben. Sowohl in den meisten Entwicklungsländern als auch in Industrieländern ist Brustkrebs die häufigste krebserkrankte Todesursache bei Frauen [14].

Die 5-Jahres-Prävalenz liegt in Europa zwischen rund 250 und 850 pro 100 000 Frauen [15]. Die höchsten Raten finden sich in Zentraleuropa und Skandinavien (Abb. 5). Hohe Inzidenzraten und eine gute Prognose führen dazu, dass in diesen Ländern viele Frauen leben, die innerhalb der letzten 5 Jahre erkrankt sind. Deutschland liegt mit einer rohen Rate von 685,3 pro 100 000 bzw. rund 250 000 Frauen, die innerhalb der letzten 5 Jahre an Brustkrebs erkrankt sind, im oberen Drittel der Rangliste; dies deutet auf einen hohen Anteil prognostisch günstiger Tumore bei Erstkrankung hin.

## Fazit

Die Epidemiologie des Brustkrebses hat sich in den letzten Jahren deutlich verändert, die Zahl der erkrankten Frauen ist weiter angestiegen. Aktuell (im Jahr 2009) erkrankten in Deutschland rund 72 000 Frauen an einem invasiven Mammakarzinom, weitere 6500 Frauen erhalten die Diagnose eines In-situ-Mammakarzinoms. Damit ist Brustkrebs bei Frauen die am häufigsten gestellte Krebsdiagnose. Die Prognose des Mammakarzinoms ist dank der zunehmend diagnostisierten günstigen Tumorstadien (40% T1, 30% T2) und den Innovationen in der Therapie mit einem relativen 5-Jahres-Überleben von 86% als gut zu bezeichnen. In 2002/2003 lag das relative Überleben in Deutschland und auch in Gesamt-Europa noch bei 79% [13]. Heute leben in Deutschland rund 250 000 Frauen mit einer Brustkrebsdiagnose innerhalb der letzten 5 Jahre [18].

Beginnend im Jahr 2005 wurde das Mammografie-Screening in Deutschland eingeführt. Eine Flächendeckung wurde im Jahr

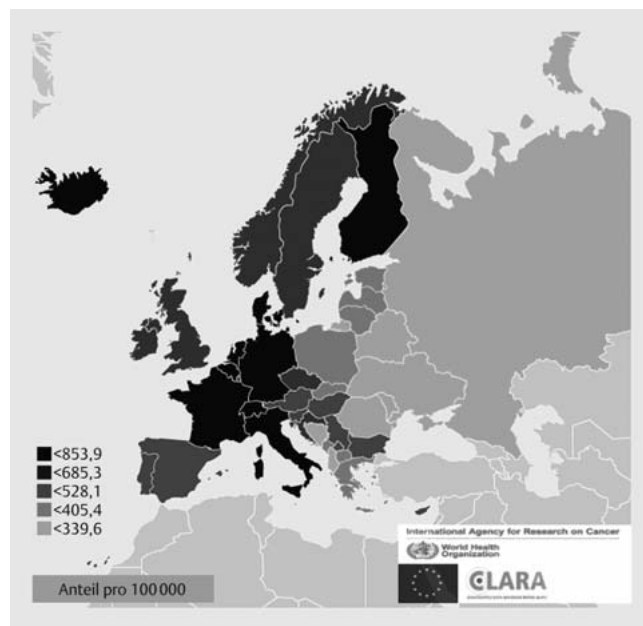

**Abb. 5** Fünf-Jahres-Brustkrebsprävalenz in Europa (Datenquelle: European Cancer Observatory [15]).

2008 erreicht. Ob durch die systematische Untersuchung von Frauen in der Altersgruppe 50–69 Jahre in Deutschland eine weitere Mortalitätsreduktion erreicht werden kann, wird sich in den kommenden Jahren zeigen. Erste Hinweise hierfür könnte die günstigere Stadienverteilung unter den Teilnehmerinnen des Mammografie-Screening-Programms im Vergleich zur gleichaltrigen Bevölkerung vor Beginn des Screenings sein.

## Interessenkonflikt

Nein.

## Literatur

- 1 Gesellschaft der epidemiologischen Krebsregister in Deutschland und das Robert Koch-Institut, Hrsg. Krebs in Deutschland 2007–2008. Häufigkeiten und Trends. 8. überarbeitete, aktualisierte Auflage. Berlin: 2012
- 2 Atlas der Krebsinzidenz und -mortalität. Im Internet: <http://www.gekid.de>; Stand: 8.10.2012
- 3 Kooperationsgemeinschaft Mammographie, Hrsg. Evaluationsbericht 2008–2009. Ergebnisse des Mammographie-Screening-Programms in Deutschland. Berlin: 2012
- 4 Gennaro G, Hendrick RE, Ruppel P et al. Performance comparison of single-view digital breast tomosynthesis plus single-view digital mammography with two-view digital mammography. *Eur Radiol* 2012; Sep 14 [Epub ahead of print]
- 5 Michell MJ, Iqbal A, Wasan RK et al. A comparison of the accuracy of film-screen mammography, full-field digital mammography, and digital breast tomosynthesis. *Clin Radiol* 2012; 67: 976–981
- 6 Noroozian M, Hadjiiski L, Rahnama-Moghadam S et al. Digital breast tomosynthesis is comparable to mammographic spot views for mass characterization. *Radiology* 2012; 262: 61–68
- 7 Svahn TM, Chakraborty DP, Ikeda D et al. Breast tomosynthesis and digital mammography: a comparison of diagnostic accuracy. *Br J Radiol* 2012; 85: e1074–e1082
- 8 Albert U-S. Stufe-3-Leitlinie – Brustkrebs-Früherkennung in Deutschland. 1. Aktualisierung. München, Wien, New York: W. Zuckschwerdt Verlag; 2008
- 9 Gesundheitsberichterstattung des Bundes. Im Internet: <http://www.gbe-bund.de>; Stand: 8.10.2012
- 10 Katalinic A, Pritzkuleit R, Waldmann A. Recent trends in breast cancer incidence and mortality in Germany. *Breast Care* 2009; 4: 75–80
- 11 Esserman L, Shieh Y, Thompson I. Rethinking screening for breast cancer and prostate cancer. *JAMA* 2009; 302: 1685–1692
- 12 Independent UK Panel on Breast Cancer Screening. The benefits and harms of breast cancer screening: an independent review. *Lancet* 2012; 380: 1778–1786
- 13 Karim-Kos HE, de Vries E, Soerjomataram I et al. Recent trends of cancer in Europe: a combined approach of incidence, survival and mortality for 17 cancer sites since the 1990s. *Eur J Cancer* 2008; 44: 1345–1389
- 14 Globocan 2008 Database. Im Internet: <http://www-dep.iarc.fr/globocan/database.htm>; Stand: 8.10.2012
- 15 ECO website: European Cancer Observatory: Cancer incidence, mortality, prevalence and survival in Europe. Version 1.0 (September 2012). European Network of Cancer Registries, International Agency for Research on Cancer. Im Internet: <http://eco.iarc.fr>; Stand: 8.10.2012
- 16 Machleidt A, Diermeier-Daucher S, Mögele M et al. Her4-JMa-Rezeptor als positiv prognostischer Marker in triple negativen Mammakarzinomen. *Geburtsh Frauenheilk* 2012; 72 - P57
- 17 Untch M. Die neue Leitlinie der Arbeitsgemeinschaft für Gynäkologische Onkologie (AGO) zur operativen Therapie der Axilla bei Mammakarzinom. *Geburtsh Frauenheilk* 2011; 71 - B25
- 18 Schmidt M, Fasching PA, Beckmann MW et al. Biomarkers in breast cancer – an update. *Geburtsh Frauenheilk* 2012; 72: 819–832
- 19 Lüftner D, Lux MP, Maass N et al. Advances in breast cancer – looking back over the year. *Geburtsh Frauenheilk* 2012; 72: 1117–1129
- 20 Kolberg H-C, Lüftner D, Lux MP et al. Breast cancer 2012 – new aspects. *Geburtsh Frauenheilk* 2012; 72: 602–615
